# Supplementary material for: Structure and Neuroprotector Properties of a Complex Compound of Lithium with Comenic Acid
Source: MDPI journal article supplement (doi:10.3390/ijms25010286), 2023-12-24

## CONTENTS

|                                                                                                                                                                                                                                                                 |    |
|-----------------------------------------------------------------------------------------------------------------------------------------------------------------------------------------------------------------------------------------------------------------|----|
| <b>Table S1.</b> Results of simultaneous thermal analysis/mass spectrometry of a sample of lithium comenate hydrate.....                                                                                                                                        | 2  |
| <b>Table S2.</b> Characteristic frequencies ( $\text{cm}^{-1}$ ) and their assignments in the FTIR spectra of comenic acid (1) and lithium comenate (2).....                                                                                                    | 2  |
| <b>Table S3.</b> Parameters of absorption bands in the electronic spectrum lithium comenate.....                                                                                                                                                                | 2  |
| <b>Table S4.</b> Crystallographic data, experimental parameters and refinement of the lithium comenate tetrahydrate structure (according to X-Ray results) .....                                                                                                | 3  |
| <b>Table S5.</b> Fractional Atomic Coordinates ( $\times 10^4$ ) and Equivalent Isotropic Displacement Parameters ( $\text{\AA}^2 \times 10^3$ ) for $[\text{Li}(\text{HCom})(\text{H}_2\text{O})_3] \cdot \text{H}_2\text{O}$ .....                            | 4  |
| <b>Table S6.</b> Anisotropic Displacement Parameters ( $\text{\AA}^2 \times 10^3$ ) for $[\text{Li}(\text{HCom})(\text{H}_2\text{O})_3] \cdot \text{H}_2\text{O}$ . .....                                                                                       | 4  |
| <b>Table S7.</b> Bond Lengths for lithium comenate tetrahydrate $[\text{Li}(\text{HCom})(\text{H}_2\text{O})_3] \cdot \text{H}_2\text{O}$ .....                                                                                                                 | 5  |
| <b>Table S8.</b> Bond angles for lithium comenate tetrahydrate $[\text{Li}(\text{HCom})(\text{H}_2\text{O})_3] \cdot \text{H}_2\text{O}$ .....                                                                                                                  | 5  |
| <b>Table S9.</b> Torsion Angles for lithium comenate tetrahydrate $[\text{Li}(\text{HCom})(\text{H}_2\text{O})_3] \cdot \text{H}_2\text{O}$ .....                                                                                                               | 5  |
| <b>Table S10.</b> Hydrogen Atom Coordinates ( $\text{\AA} \times 10^4$ ) and Isotropic Displacement Parameters ( $\text{\AA}^2 \times 10^3$ ) for lithium comenate tetrahydrate $[\text{Li}(\text{HCom})(\text{H}_2\text{O})_3] \cdot \text{H}_2\text{O}$ ..... | 6  |
| <b>Table S11.</b> Hydrogen Bonds for lithium comenate tetrahydrate $[\text{Li}(\text{HCom})(\text{H}_2\text{O})_3] \cdot \text{H}_2\text{O}$ .....                                                                                                              | 6  |
| <b>Figure S1.</b> TG-, DTG-, DSC-curves of a complex compound $[\text{Li}(\text{HCom})(\text{H}_2\text{O})_3] \cdot \text{H}_2\text{O}$ .....                                                                                                                   | 7  |
| <b>Figure S2.</b> Non-valent intermolecular contacts in a lithium comenate crystal.....                                                                                                                                                                         | 8  |
| <b>Figure S3.</b> $^1\text{H}$ NMR (400 MHz, $\text{D}_2\text{O}$ ) spectrum of $[\text{Li}(\text{HCom})(\text{H}_2\text{O})_3] \cdot \text{H}_2\text{O}$ .....                                                                                                 | 8  |
| <b>Figure S4.</b> $^{13}\text{C}$ NMR (101 MHz, $\text{D}_2\text{O}$ ) spectrum of $[\text{Li}(\text{HCom})(\text{H}_2\text{O})_3] \cdot \text{H}_2\text{O}$ .....                                                                                              | 8  |
| <b>Figure S5.</b> FTIR spectrum of comenic acid (ATR mode) .....                                                                                                                                                                                                | 9  |
| <b>Figure S6.</b> FTIR spectrum of complex compound $[\text{Li}(\text{HCom})(\text{H}_2\text{O})_3] \cdot \text{H}_2\text{O}$ (ATR mode).....                                                                                                                   | 10 |

**Table S1.** Results of simultaneous thermal analysis/mass spectrometry of a sample of lithium comenate hydrate.

| m/z<br>T, °C | 2<br>(H <sub>2</sub> ) | 18 (H <sub>2</sub> O) | 28 (CO)             | 44 (CO <sub>2</sub> ) | 57                   | 91                   | 105                  | 112                  | 154                  |
|--------------|------------------------|-----------------------|---------------------|-----------------------|----------------------|----------------------|----------------------|----------------------|----------------------|
| 99.1         | –                      | –                     | –                   | –                     | –                    | –                    | –                    | –                    | –                    |
| 156.7        | –                      | <40·10 <sup>-9</sup>  | –                   | –                     | –                    | –                    | –                    | –                    | –                    |
| 339-354      | –                      | –                     | 12·10 <sup>-9</sup> | 12·10 <sup>-9</sup>   | –                    | –                    | –                    | 0.6·10 <sup>-9</sup> | –                    |
| 413.1        | –                      | –                     | –                   | –                     | –                    | –                    | –                    | –                    | –                    |
| <600         | 5·10 <sup>-9</sup>     | –                     | 20·10 <sup>-9</sup> | –                     | 0.5·10 <sup>-9</sup> | 0.4·10 <sup>-9</sup> | 0.4·10 <sup>-9</sup> | –                    | 0.1·10 <sup>-9</sup> |

**Table S2.** Characteristic frequencies (cm<sup>-1</sup>) and their assignments in the FTIR spectra of comenic acid (1) and lithium comenate (2)

| Compound | $\nu$ O-H | $\nu$ C-H | $\nu$ O-H<br>(H <sub>2</sub> O) | $\nu$ C=O<br>(>C <sup>4</sup> =O) | $\nu$ C=O<br>(>COOH) | $\nu_{as}$ COO <sup>-</sup> | $\nu_{sy}$ COO <sup>-</sup> | $\Delta\nu = \nu_{as} \text{ COO}^- - \nu_{sy} \text{ COO}^-$ | $\nu$ C-O-C<br>( $\gamma$ -pyron) | $\nu$ C-O | $\nu$ C-OH | $\delta$ C-OH | $\nu$ M-O |
|----------|-----------|-----------|---------------------------------|-----------------------------------|----------------------|-----------------------------|-----------------------------|---------------------------------------------------------------|-----------------------------------|-----------|------------|---------------|-----------|
| <b>1</b> | 3338      | 3086      | 3000-2450                       | 1726                              | 1628                 | –                           | –                           | –                                                             | 1219                              | 1203      | 1144       | 1099          | –         |
| <b>2</b> | 3612-3323 | 3080      | –                               | –                                 | –                    | 1601                        | 1354                        | 247                                                           | 1261                              | 1203      | 1153       | 1103          | 405       |

**Table S3.** Parameters of absorption bands in the electronic spectrum lithium comenate

| $\lambda$ max,<br>nm | Conjugate<br>system | Transition      | A,<br>rel. units | $\epsilon$ ,<br>l/mol·cm | log $\epsilon$ |
|----------------------|---------------------|-----------------|------------------|--------------------------|----------------|
| <b>200.2</b>         | –COOH               | n→ $\pi^*$      | 0.1980           | 19498                    | 4.29           |
| <b>221.6</b>         | =C–O–C=             | n→ $\pi^*$      | 0.2348           | 23442                    | 4.37           |
| <b>243.6</b>         | >C=O                | n→ $\pi^*$      | 0.0689           | 7079                     | 3.85           |
| <b>282.0</b>         | –OH                 | $\pi$ → $\pi^*$ | 0.0617           | 6166                     | 3.79           |

**Table S4.** Crystallographic data, experimental parameters and refinement of the lithium comenate tetrahydrate structure (according to X-Ray results)

|                                                |                                                                |
|------------------------------------------------|----------------------------------------------------------------|
| Empirical formula                              | C <sub>6</sub> H <sub>11</sub> LiO <sub>9</sub>                |
| Formula weight                                 | 234.09                                                         |
| Temperature/K                                  | 100(2)                                                         |
| Crystal system                                 | orthorhombic                                                   |
| Space group                                    | Pna2 <sub>1</sub>                                              |
| a/Å                                            | 6.99950(6)                                                     |
| b/Å                                            | 21.05846(19)                                                   |
| c/Å                                            | 6.77637(7)                                                     |
| $\alpha/^\circ$                                | 90                                                             |
| $\beta/^\circ$                                 | 90                                                             |
| $\gamma/^\circ$                                | 90                                                             |
| Volume/Å <sup>3</sup>                          | 998.828(16)                                                    |
| Z                                              | 4                                                              |
| $\rho_{\text{calc}}/\text{cm}^3$               | 1.557                                                          |
| $\mu/\text{mm}^{-1}$                           | 1.317                                                          |
| F(000)                                         | 488.0                                                          |
| Crystal size/mm <sup>3</sup>                   | 0.739 × 0.464 × 0.19                                           |
| Radiation                                      | Cu K $\alpha$ ( $\lambda$ = 1.54184)                           |
| 2 $\Theta$ range for data collection/ $^\circ$ | 8.398 to 152.766                                               |
| Index ranges                                   | -8 ≤ h ≤ 8, -26 ≤ k ≤ 26, -8 ≤ l ≤ 7                           |
| Reflections collected                          | 9325                                                           |
| Independent reflections                        | 1872 [ $R_{\text{int}}$ = 0.0240, $R_{\text{sigma}}$ = 0.0145] |
| Data/restraints/parameters                     | 1872/8/152                                                     |
| Goodness-of-fit on F <sup>2</sup>              | 1.131                                                          |
| Final R indexes [ $I \geq 2\sigma(I)$ ]        | $R_1$ = 0.0228, $wR_2$ = 0.0612                                |
| Final R indexes [all data]                     | $R_1$ = 0.0229, $wR_2$ = 0.0613                                |
| Largest diff. peak/hole / e Å <sup>-3</sup>    | 0.27/-0.20                                                     |
| Flack parameter                                | 0.06(7)                                                        |

**Table S5.** Fractional Atomic Coordinates ( $\times 10^4$ ) and Equivalent Isotropic Displacement Parameters ( $\text{\AA}^2 \times 10^3$ ) for  $[\text{Li}(\text{HCom})(\text{H}_2\text{O})_3] \cdot \text{H}_2\text{O}$ .  $U_{\text{eq}}$  is defined as 1/3 of the trace of the orthogonalised  $U_{\text{IJ}}$  tensor.

| Atom | <i>x</i>     | <i>y</i>    | <i>z</i>    | $U(\text{eq})$ |
|------|--------------|-------------|-------------|----------------|
| O1   | -634.4 (17)  | 1352.7 (5)  | 7897 (2)    | 14.4 (3)       |
| O2   | -1642.5 (18) | 2180.6 (5)  | 9702 (2)    | 15.5 (3)       |
| O3   | 338.4 (15)   | 2116.0 (5)  | 4975.6 (19) | 10.1 (3)       |
| O4   | 1608.0 (17)  | 3516.8 (5)  | 2136 (2)    | 13.2 (3)       |
| O5   | 243.0 (17)   | 4044.4 (5)  | 5382 (2)    | 14.3 (3)       |
| O6   | 841.4 (18)   | 5282.6 (5)  | 3676 (2)    | 13.7 (3)       |
| O7   | 2849.8 (16)  | 4654.3 (5)  | 284 (2)     | 12.8 (3)       |
| O8   | 4726.9 (17)  | 4339.6 (5)  | 4379 (2)    | 13.2 (3)       |
| O9   | 6918.8 (18)  | 3885.2 (6)  | 1245 (2)    | 18.3 (3)       |
| C1   | -927 (2)     | 1932.1 (7)  | 8200 (3)    | 11.1 (3)       |
| C2   | -347 (2)     | 2397.8 (8)  | 6611 (3)    | 10.0 (3)       |
| C3   | -459 (2)     | 3036.1 (7)  | 6826 (3)    | 11.1 (3)       |
| C4   | 211 (2)      | 3450.1 (7)  | 5289 (3)    | 10.8 (3)       |
| C5   | 943 (2)      | 3130.0 (7)  | 3561 (3)    | 10.7 (3)       |
| C6   | 972 (2)      | 2485.2 (8)  | 3464 (2)    | 10.5 (3)       |
| Li1  | 2094 (4)     | 4447.8 (13) | 3168 (5)    | 14.6 (6)       |

**Table S6.** Anisotropic Displacement Parameters ( $\text{\AA}^2 \times 10^3$ ) for  $[\text{Li}(\text{HCom})(\text{H}_2\text{O})_3] \cdot \text{H}_2\text{O}$ . The Anisotropic displacement factor exponent takes the form:  $-2\pi^2[h^2a^{*2}U_{11}+2hka^*b^*U_{12}+\dots]$ .

| Atom | $U_{11}$  | $U_{22}$  | $U_{33}$  | $U_{23}$ | $U_{13}$  | $U_{12}$  |
|------|-----------|-----------|-----------|----------|-----------|-----------|
| O1   | 21.1 (6)  | 10.3 (5)  | 11.7 (7)  | 1.8 (5)  | 2.0 (5)   | -0.4 (4)  |
| O2   | 22.2 (6)  | 13.3 (6)  | 10.9 (7)  | 0.0 (5)  | 5.2 (5)   | -1.1 (4)  |
| O3   | 12.8 (5)  | 9.1 (5)   | 8.4 (6)   | -0.5 (5) | 1.6 (5)   | -0.8 (4)  |
| O4   | 19.5 (5)  | 9.5 (5)   | 10.7 (7)  | 0.2 (5)  | 6.0 (5)   | -1.3 (4)  |
| O5   | 19.9 (6)  | 9.0 (5)   | 13.9 (7)  | -1.2 (5) | 3.6 (5)   | -0.1 (4)  |
| O6   | 17.0 (6)  | 12.3 (5)  | 11.8 (6)  | 3.5 (5)  | 1.2 (5)   | 1.2 (4)   |
| O7   | 15.5 (5)  | 9.4 (5)   | 13.4 (7)  | -0.4 (5) | 1.4 (5)   | -1.1 (4)  |
| O8   | 16.8 (6)  | 12.2 (5)  | 10.7 (6)  | 1.7 (5)  | 0.5 (5)   | -0.5 (4)  |
| O9   | 17.6 (6)  | 19.7 (6)  | 17.5 (7)  | 0.5 (6)  | 0.7 (5)   | -2.1 (5)  |
| C1   | 10.5 (7)  | 12.1 (7)  | 10.5 (9)  | 1.9 (6)  | -0.7 (6)  | -2.1 (5)  |
| C2   | 9.4 (7)   | 13.6 (7)  | 7.0 (8)   | -0.4 (7) | 0.4 (5)   | -0.6 (5)  |
| C3   | 10.7 (7)  | 13.5 (7)  | 9.0 (9)   | -0.5 (7) | 1.4 (6)   | 0.0 (5)   |
| C4   | 11.1 (6)  | 10.6 (6)  | 10.8 (9)  | -0.7 (7) | -1.2 (6)  | 0.1 (5)   |
| C5   | 11.2 (7)  | 12.1 (7)  | 8.7 (8)   | 0.9 (6)  | -0.3 (7)  | -1.1 (6)  |
| C6   | 11.8 (7)  | 13.0 (7)  | 6.5 (8)   | 0.1 (7)  | 1.2 (6)   | -1.1 (6)  |
| Li1  | 18.2 (14) | 11.7 (13) | 13.9 (17) | 0.2 (12) | -0.9 (11) | -0.2 (10) |

**Table S7.** Bond Lengths for lithium comenate tetrahydrate  
[Li(HCom)(H<sub>2</sub>O)<sub>3</sub>] $\cdot$ H<sub>2</sub>O

| Atom | Atom | Length/Å    | Atom | Atom | Length/Å  |
|------|------|-------------|------|------|-----------|
| O1   | C1   | 1.254 (2)   | O6   | Li1  | 1.994 (3) |
| O2   | C1   | 1.250 (2)   | O7   | Li1  | 2.070 (4) |
| O3   | C2   | 1.346 (2)   | O8   | Li1  | 2.030 (3) |
| O3   | C6   | 1.361 (2)   | C1   | C2   | 1.512 (2) |
| O4   | C5   | 1.346 (2)   | C2   | C3   | 1.354 (2) |
| O4   | Li1  | 2.109 (3)   | C3   | C4   | 1.437 (2) |
| O5   | C4   | 1.2533 (19) | C4   | C5   | 1.445 (2) |
| O5   | Li1  | 2.157 (3)   | C5   | C6   | 1.360 (2) |

**Table S8.** Bond angles for lithium comenate tetrahydrate [Li(HCom)(H<sub>2</sub>O)<sub>3</sub>] $\cdot$ H<sub>2</sub>O

| Atom | Atom | Atom | Angle/°     | Atom | Atom | Atom | Angle/°     |
|------|------|------|-------------|------|------|------|-------------|
| C2   | O3   | C6   | 118.99 (13) | O4   | C5   | C6   | 124.34 (15) |
| C5   | O4   | Li1  | 112.37 (14) | C6   | C5   | C4   | 120.71 (16) |
| C4   | O5   | Li1  | 111.67 (13) | C5   | C6   | O3   | 121.95 (15) |
| O1   | C1   | C2   | 118.12 (16) | O4   | Li1  | O5   | 76.55 (11)  |
| O2   | C1   | O1   | 127.29 (16) | O6   | Li1  | O4   | 143.68 (17) |
| O2   | C1   | C2   | 114.59 (14) | O6   | Li1  | O5   | 87.88 (13)  |
| O3   | C2   | C1   | 113.33 (13) | O6   | Li1  | O7   | 95.18 (13)  |
| O3   | C2   | C3   | 123.14 (15) | O6   | Li1  | O8   | 115.35 (16) |
| C3   | C2   | C1   | 123.50 (16) | O7   | Li1  | O4   | 85.62 (13)  |
| C2   | C3   | C4   | 120.37 (16) | O7   | Li1  | O5   | 153.22 (17) |
| O5   | C4   | C3   | 125.14 (16) | O8   | Li1  | O4   | 100.14 (13) |
| O5   | C4   | C5   | 120.00 (16) | O8   | Li1  | O5   | 102.71 (15) |
| C3   | C4   | C5   | 114.83 (14) | O8   | Li1  | O7   | 99.96 (14)  |
| O4   | C5   | C4   | 114.93 (14) |      |      |      |             |

**Table S9.** Torsion Angles for lithium comenate tetrahydrate  
[Li(HCom)(H<sub>2</sub>O)<sub>3</sub>] $\cdot$ H<sub>2</sub>O

| A  | B  | C  | D  | Angle/°      | A   | B  | C  | D  | Angle/°      |
|----|----|----|----|--------------|-----|----|----|----|--------------|
| O1 | C1 | C2 | O3 | 3.5 (2)      | C2  | C3 | C4 | C5 | 1.2 (2)      |
| O1 | C1 | C2 | C3 | -174.92 (15) | C3  | C4 | C5 | O4 | -178.69 (14) |
| O2 | C1 | C2 | O3 | -177.16 (13) | C3  | C4 | C5 | C6 | -0.2 (2)     |
| O2 | C1 | C2 | C3 | 4.4 (2)      | C4  | C5 | C6 | O3 | -0.6 (2)     |
| O3 | C2 | C3 | C4 | -1.5 (2)     | C6  | O3 | C2 | C1 | -177.70 (13) |
| O4 | C5 | C6 | O3 | 177.77 (14)  | C6  | O3 | C2 | C3 | 0.7 (2)      |
| O5 | C4 | C5 | O4 | -0.5 (2)     | Li1 | O4 | C5 | C4 | 16.13 (18)   |
| O5 | C4 | C5 | C6 | 177.97 (15)  | Li1 | O4 | C5 | C6 | -162.28 (16) |
| C1 | C2 | C3 | C4 | 176.74 (14)  | Li1 | O5 | C4 | C3 | 163.02 (15)  |
| C2 | O3 | C6 | C5 | 0.3 (2)      | Li1 | O5 | C4 | C5 | -15.0 (2)    |
| C2 | C3 | C4 | O5 | -176.87 (15) |     |    |    |    |              |

**Table S10.** Hydrogen Atom Coordinates ( $\text{\AA}\times 10^4$ ) and Isotropic Displacement Parameters ( $\text{\AA}^2\times 10^3$ ) for lithium comenate tetrahydrate  $[\text{Li}(\text{HCom})(\text{H}_2\text{O})_3]\cdot\text{H}_2\text{O}$

| Atom | <i>x</i> | <i>y</i> | <i>z</i> | U(eq) |
|------|----------|----------|----------|-------|
| H6A  | 628.72   | 5468.45  | 2584.67  | 16    |
| H6B  | -261.72  | 5221.06  | 4164.61  | 16    |
| H7A  | 3698.39  | 4943.2   | 276.77   | 15    |
| H7B  | 3400.67  | 4333.58  | -227.97  | 15    |
| H8A  | 4668.11  | 4080.38  | 5347.39  | 16    |
| H8B  | 5473.39  | 4158.98  | 3553.73  | 16    |
| H4   | 2207.77  | 3301.87  | 1182.29  | 22    |
| H9A  | 7745.01  | 4147.48  | 822.32   | 22    |
| H9B  | 6132.28  | 3844.9   | 297.05   | 22    |
| H3   | -983.71  | 3211.06  | 7999.07  | 13    |
| H6   | 1449.99  | 2286.54  | 2305.64  | 13    |

**Table S11.** Hydrogen Bonds for lithium comenate tetrahydrate  $[\text{Li}(\text{HCom})(\text{H}_2\text{O})_3]\cdot\text{H}_2\text{O}$

| D  | H   | A               | d(D-H)/ $\text{\AA}$ | d(H-A)/ $\text{\AA}$ | d(D-A)/ $\text{\AA}$ | D-H-A/ $^\circ$ |
|----|-----|-----------------|----------------------|----------------------|----------------------|-----------------|
| O6 | H6A | O5 <sup>1</sup> | 0.85                 | 1.91                 | 2.7510 (18)          | 169.3           |
| O6 | H6B | O7 <sup>2</sup> | 0.85                 | 1.98                 | 2.8073 (17)          | 163.6           |
| O7 | H7A | O8 <sup>3</sup> | 0.85                 | 1.97                 | 2.7825 (16)          | 160.6           |
| O7 | H7B | O1 <sup>4</sup> | 0.85                 | 2.04                 | 2.8702 (17)          | 165.0           |
| O8 | H8A | O1 <sup>5</sup> | 0.85                 | 1.97                 | 2.8063 (19)          | 167.6           |
| O8 | H8B | O9              | 0.85                 | 1.95                 | 2.789 (2)            | 166.8           |
| O4 | H4  | O2 <sup>4</sup> | 0.89                 | 1.64                 | 2.5251 (17)          | 170.8           |

**Figure S1.** TG-, DTG-, DSC-curves of a complex compound  
 $[\text{Li}(\text{HCom})(\text{H}_2\text{O})_3] \cdot \text{H}_2\text{O}$

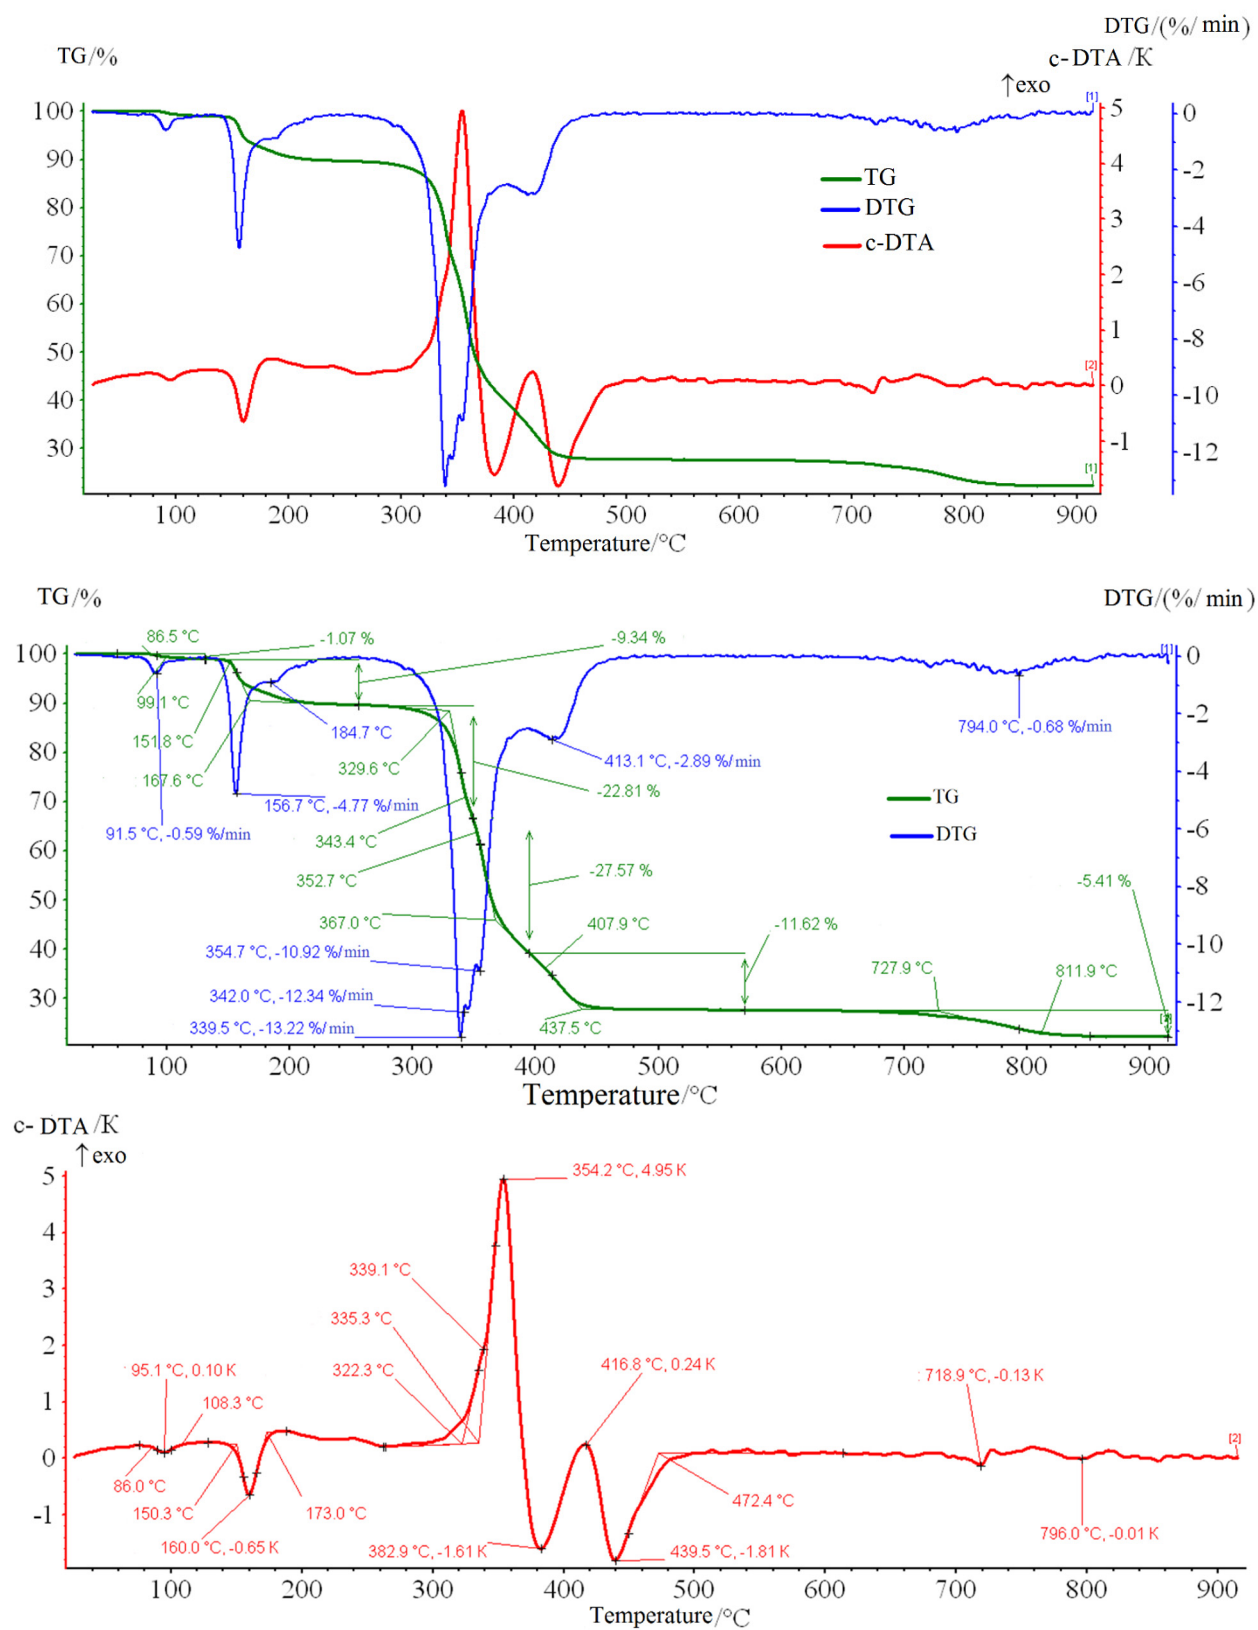

**Figure S2.** Non-valent intermolecular contacts in a lithium comenate crystal

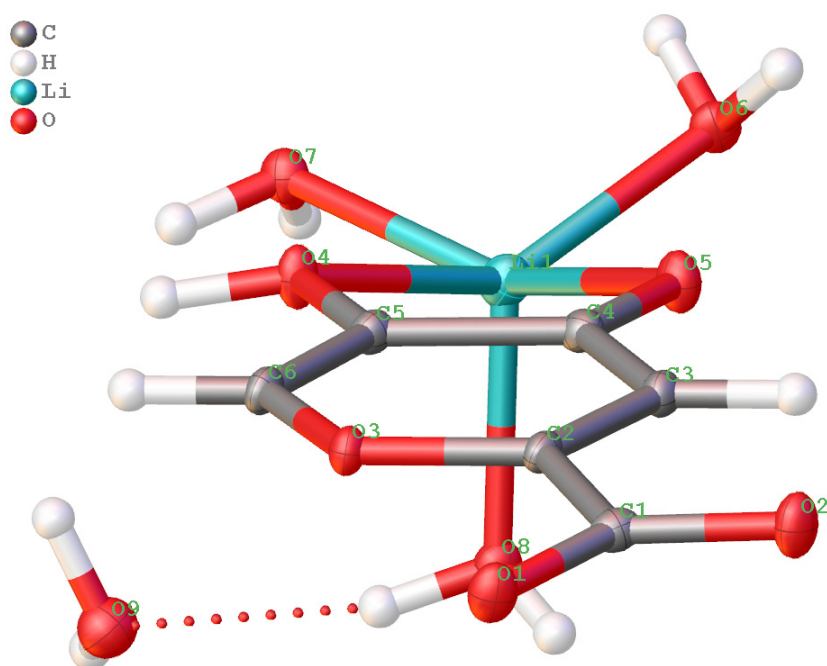

**Figure S3.**  $^1\text{H}$  NMR (400 MHz,  $\text{D}_2\text{O}$ ) spectrum of  $[\text{Li}(\text{HCom})(\text{H}_2\text{O})_3] \cdot \text{H}_2\text{O}$

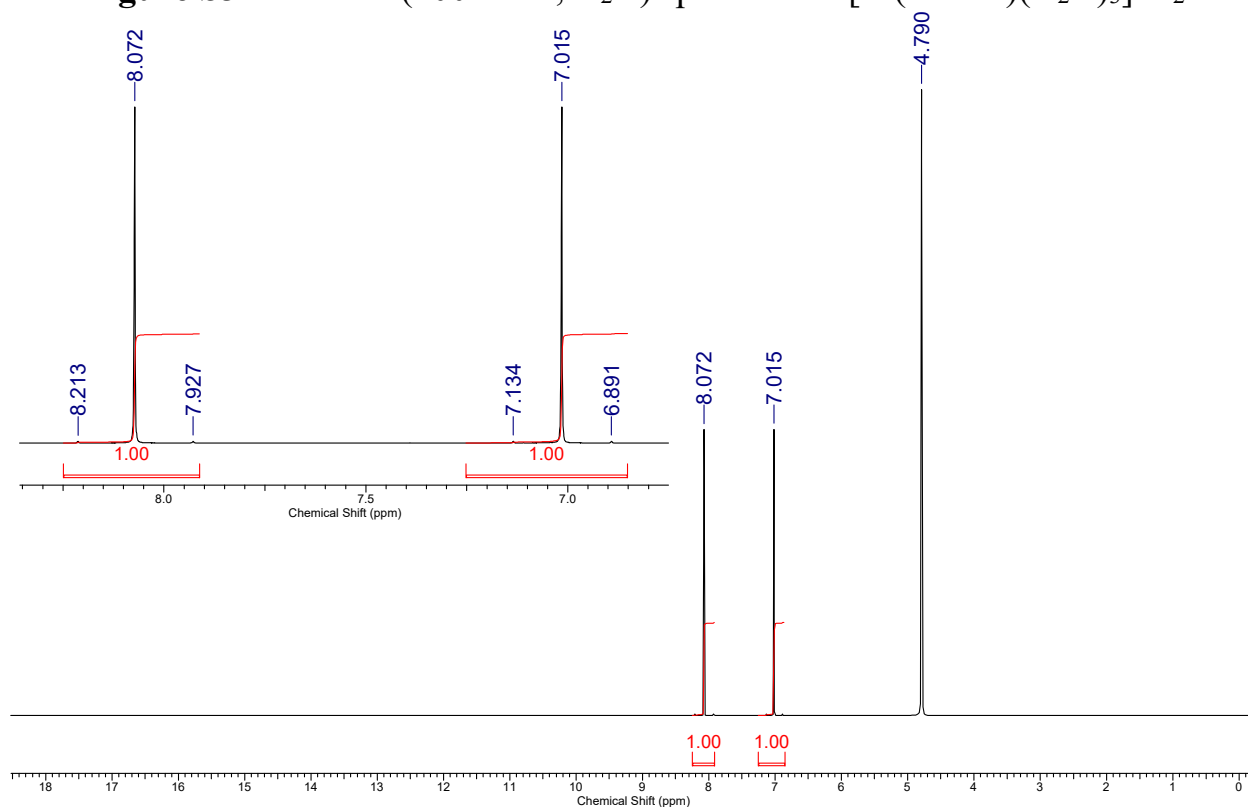

**Figure S4.**  $^{13}\text{C}$  NMR (101 MHz,  $\text{D}_2\text{O}$ ) spectrum of  $[\text{Li}(\text{HCom})(\text{H}_2\text{O})_3] \cdot \text{H}_2\text{O}$



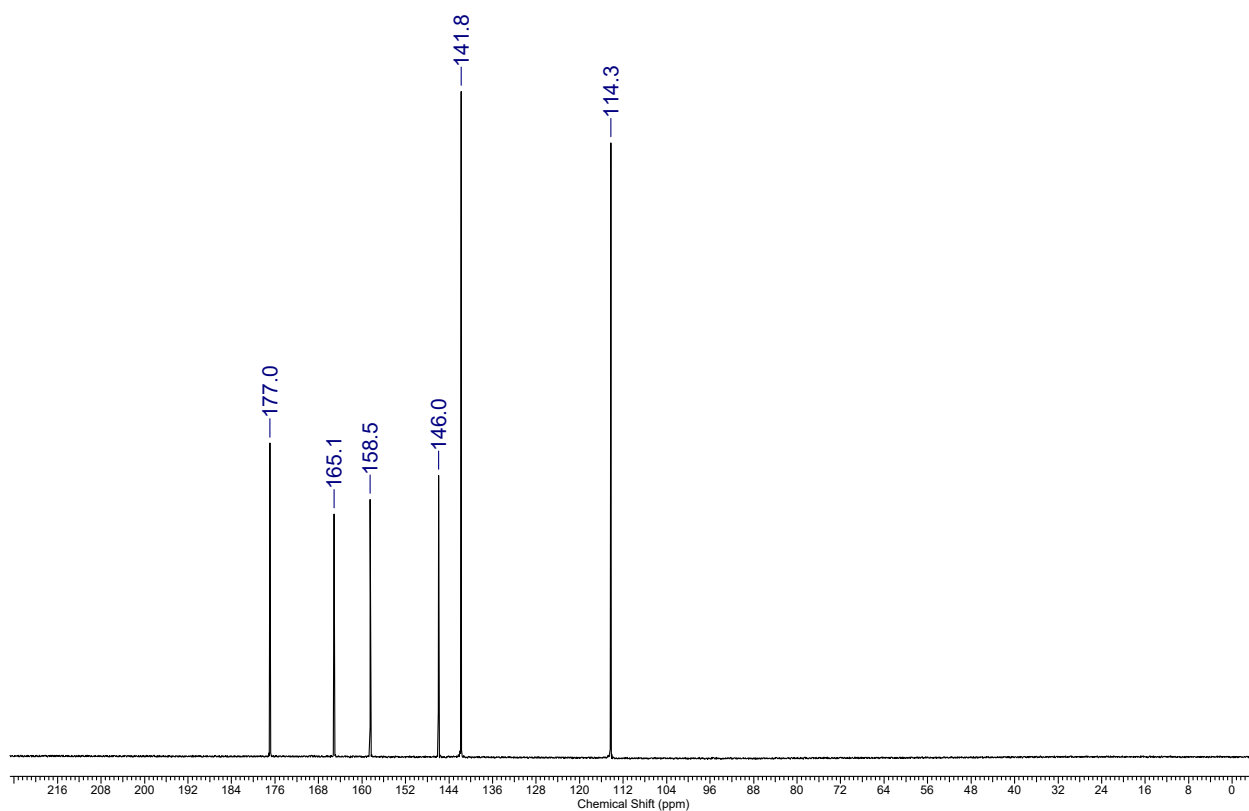

**Figure S5. FTIR spectrum of comenic acid (ATR mode)**

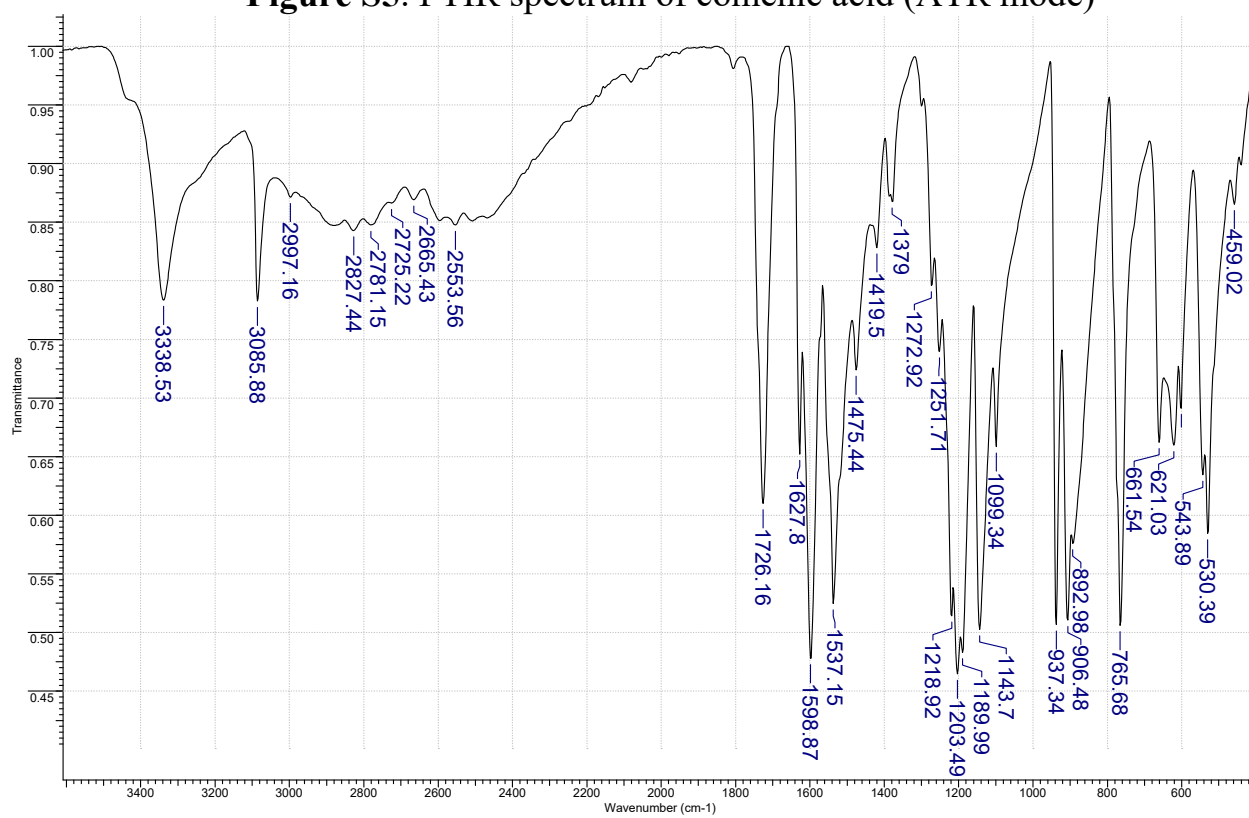

**Figure S6.** FTIR spectrum of complex compound  $[\text{Li}(\text{HCom})(\text{H}_2\text{O})_3] \cdot \text{H}_2\text{O}$  (ATR mode)

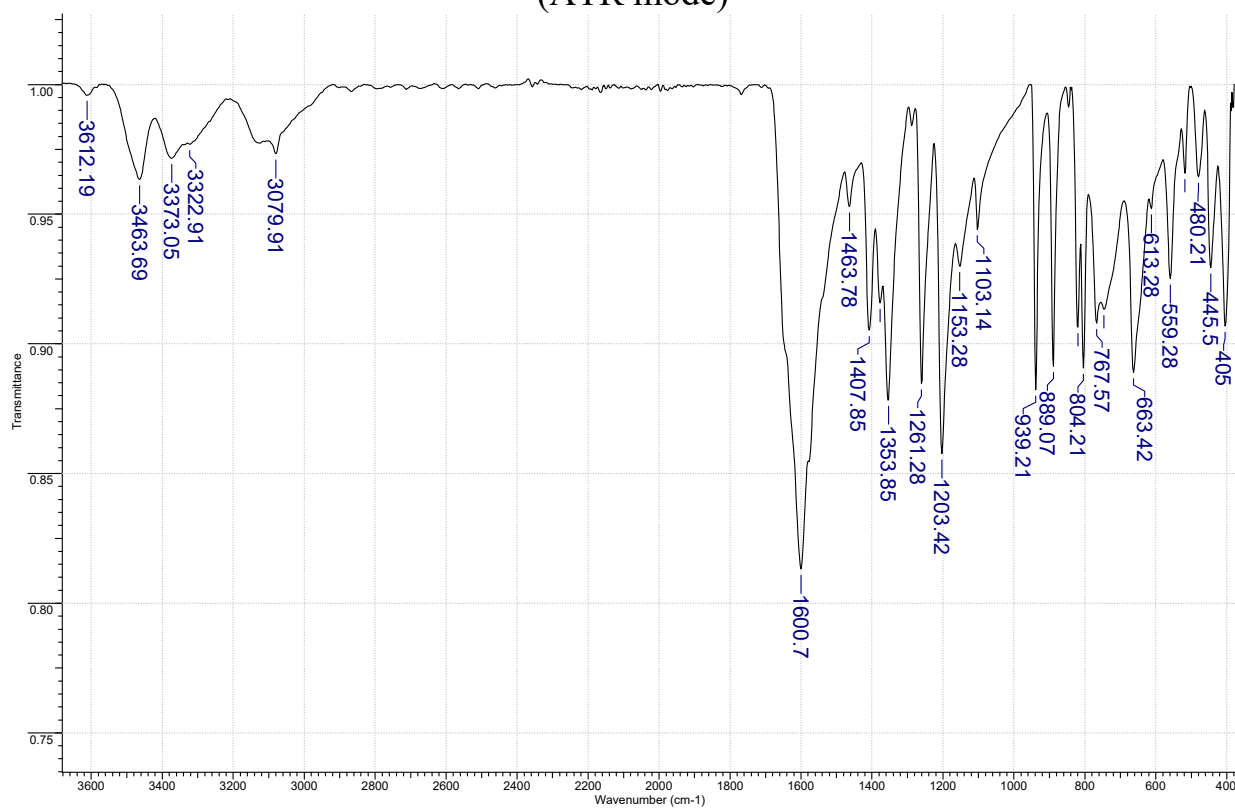

Supplement: s1 [file s1]
